# Supplementary material for: Bioactive silk hydrogels with tunable mechanical properties
Source: Royal Society of Chemistry journal article supplement (doi:10.1039/c8tb00607e), 2018-01-01
Supplement: c8tb00607e1.pdf [file c8tb00607e1.pdf]

## Bioactive Silk Hydrogels with Tunable Mechanical Properties

Xue Wang<sup>a,1</sup>, Zhaozhao Ding<sup>b,1</sup>, Chen Wang<sup>c</sup>, Xiangdong Chen<sup>a,\*</sup>, Hui Xu<sup>a,\*</sup>, Qiang Lu<sup>b,\*</sup>, David L

Kaplan<sup>d</sup>

<sup>a</sup>Department of Dermatology and Dermatologic Surgery, Shanghai Ninth People's Hospital affiliated to Shanghai Jiaotong University School of Medicine, Shanghai, P. R. China.

<sup>b</sup>National Engineering Laboratory for Modern Silk & Collaborative Innovation Center of Suzhou Nano Science, Soochow University, Suzhou 215123, P. R. China.

<sup>c</sup>Department of Plastic and Reconstructive Surgery, Shanghai Ninth People's Hospital affiliated to Shanghai Jiaotong University School of Medicine, Shanghai 200011, P. R. China.

<sup>d</sup>Department of Biomedical Engineering, Tufts University, Medford, MA 02155, USA.

Xue Wang and Zhaozhao Ding are contributed equally to this paper.

### \* Corresponding author:

Qiang Lu

199 Renai Road, Suzhou, P. R. China

Telephone: +86051267061649, Fax: 051267061649.

Email: [Lvqiang78@suda.edu.cn](mailto:Lvqiang78@suda.edu.cn).

Xiangdong Chen

639 Zhizaoju Road, Shanghai, P. R. China

Telephone: +8602123271699, Fax: 02123271699.

Email: [xdchen@medmail.com.cn](mailto:xdchen@medmail.com.cn)

Hui Xu

639 Zhizaoju Road, Shanghai, P. R. China

Telephone: +8602123271699, Fax: 02123271699.

Email: [xusunan@hotmail.com](mailto:xusunan@hotmail.com)

### ORCID

Qiang Lu: 0000-0003-4889-5299

David L. Kaplan: 0000-0002-9245-7774

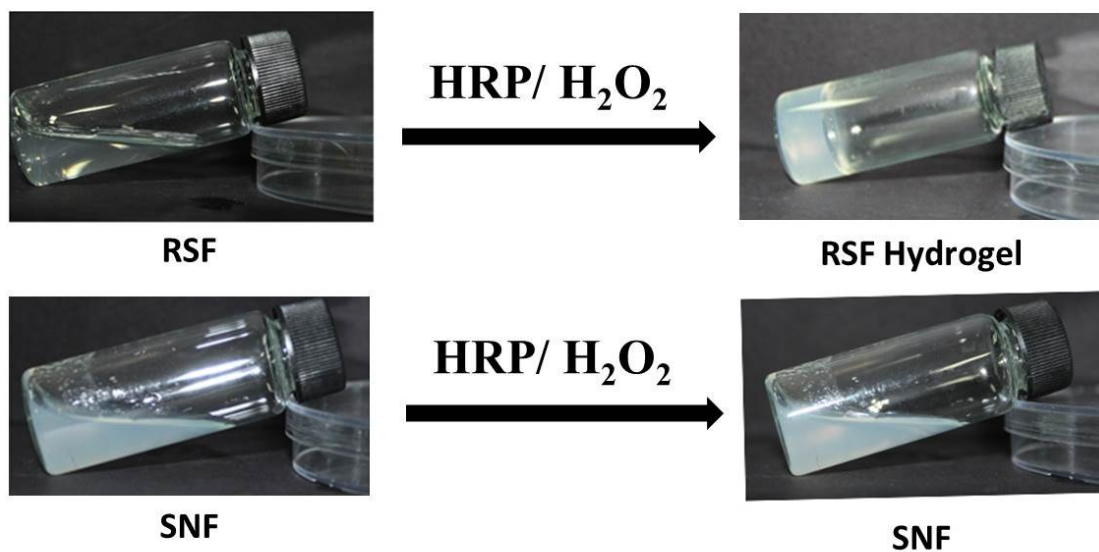

**Figure S-1.** The phase changes of regenerated silk fibroin (RSF) and silk fibroin nanofiber (SNF) solutions after the addition of HRP and H<sub>2</sub>O<sub>2</sub>. No crosslinking happened for the SNF with enzyme and peroxide but in the absence of the RSF.

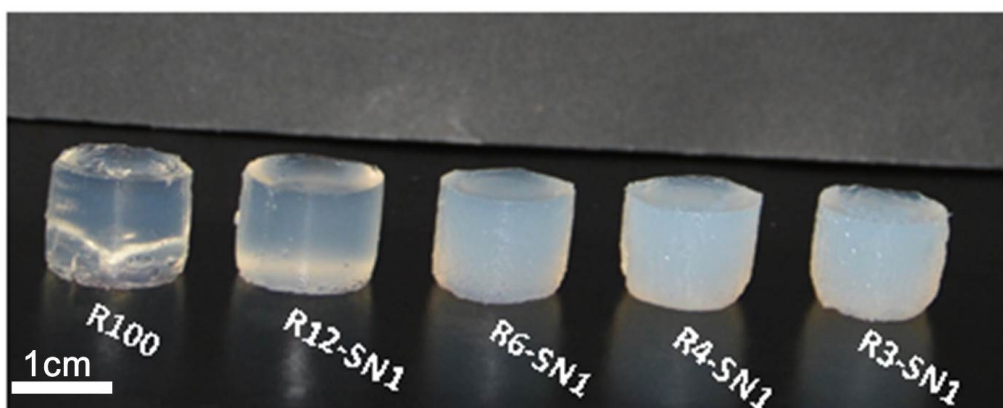

**Figure S-2.** The macrograph of silk fibroin hydrogels with different contents of SNF.

The samples were as follows: (a) R100, pure RSF hydrogel; (b) R12-SN1, the ratio of RSF and SNF was 12:1; (c) R6-SN1, the ratio of RSF and SNF was 6:1; (d) R4-SN1, the ratio of RSF and SNF was 4:1 (e) R3-SN1, the ratio of RSF and SNF was 3:1.
